# Supplementary material for: Knowledge, Attitudes, and Risk Factor Awareness Regarding Oral Cancer Among Dentists in Turkey
Source: Research Square preprint supplement (doi:10.21203/rs.3.rs-7875512/v1), 2025-12-05
Supplement: Supplementary file 1 [file b0b467a256a5383ccddfe965.docx]

| **Risk factors** | **YES** | **NO** | **DO NOT KNOW** |
| --- | --- | --- | --- |
| **Smoking and tobacco use is a risk factor for oral cancer.** |  |  |  |
| Betel quid chewing is a risk factor for oral cancer. |  |  |  |
| **A previous history of oral cancer is a risk factor for developing new oral cancer lesions.** |  |  |  |
| **Ultraviolet exposure is a risk factor for oral cancer.** |  |  |  |
| **Alcohol consumption is a risk factor for oral cancer.** |  |  |  |
| **A family history of oral cancer is a risk factor for oral cancer.** |  |  |  |
| **HPV infection is a risk factor for oral cancer.** |  |  |  |
| **Low intake of fruits and vegetables is a risk factor for oral cancer.** |  |  |  |
| **Older age is a risk factor for oral cancer.** |  |  |  |

| Knowledge of oral cancer |  |
| --- | --- |
| What is the most common type of oral cancer? | Squamous cell carcinoma |
|  | Verrucous carcinoma |
|  | Adenocarcinoma |
|  | Malignant melanoma |
| Which of the following is not considered a premalignant lesion? | Leukoplakia |
|  | Eryhtroplakia |
|  | Erosive lichen planus |
|  | Irritation fibroma |
| In which age group is oral cancer most commonly observed? | 20-40 years |
|  | 40-60 years |
|  | 60-80 years |
| After how long a biopsy should be performed for a non-healing oral lesion? | Within 7 days |
|  | Within 14 days |
|  | Within 4 weeks |
|  | Within 3 months |
| What is the five-year survival rate for oral cancer? | 10% |
|  | 25% |
|  | 50% |
|  | 90% |
| What is the most common etiological factor for oral submucous fibrosis? | Betel quid chewing |
|  | Smoking |
|  | Alcohol abuse |
|  | Poor oral hygiene |

| **Attitudes and Clinical Practices** | **YES** | **NO** | **DO NOT KNOW** |
| --- | --- | --- | --- |
| I routinely perform oral mucosal examinations. |  |  |  |
| I regularly advise my patients about oral cancer risk factors. |  |  |  |
| I regularly ask my patient about their smoking habit. |  |  |  |
| I regularly ask my patient about their alcohol consumption. |  |  |  |
| I have examined a patient with oral cancer. |  |  |  |
| I feel confident to diagnose oral cancer based on its clinical appearance. |  |  |  |
| I feel confident palpating head and neck lymph nodes. |  |  |  |
